# Supplementary material
Source: HighWire-hosted journal article supplement (https://bmjopen.bmj.com/content/12/4/e057009)
Supplement: inline-supplementary-material-4 [file inline-supplementary-material-4.pdf]

**Additional File 2: Descriptive characteristics of studies (n=83) included in the Realist Review**

| Author                                          | Year | Country | Sub-case             | Intervention type                                       | Study method/design                                                                                                      | Evaluators                | Appraisal |
|-------------------------------------------------|------|---------|----------------------|---------------------------------------------------------|--------------------------------------------------------------------------------------------------------------------------|---------------------------|-----------|
| Age Connect Cardiff & the Vale [54]             | 2017 | Wales   | Mixed Methods (grey) | Volunteer support programme targetting isolation        | Uncontrolled before-and-after design and qualitative survey feedback                                                     | In-house evaluation       | Low       |
| Age Connect Cardiff & the Vale [55]             | 2017 | Wales   | Mixed Methods (grey) | Volunteer support programme targetting isolation        | End of year reporting, monitoring data                                                                                   | In-house evaluation       | Low       |
| Age connect Cardiff & the Vale [56]             | 2017 | Wales   | Mixed Methods (grey) | Volunteer support programme targetting isolation        | Uncontrolled before-and-after design and qualitative survey feedback                                                     | In-house evaluation       | Low       |
| Bangor University [57]                          | 2019 | Wales   | Mixed Methods (grey) | The Health Precint, referral via social prescribing     | Uncontrolled before-and-after design, interviews with staff                                                              | Independent research team | Moderate  |
| Jones, Lynch [58]                               | 2019 | Wales   | Mixed Methods (grey) | Time Credits, time based community support              | Uncontrolled before-and-after design, document analysis of patient notes, interviews, focus groups, reflective diaries   | Independent research team | Low       |
| Bertotti, Frostick, Hutt, Sohanpal, Carnes [59] | 2018 | England | Mixed Methods        | Social prescribing with social prescribing coordinators | Realist evaluation including GP surveys, interviews with stakeholders and observations                                   | Independent research team | High      |
| Bickerdike, Booth, Wilson, Farley, Wright [1]   | 2017 | England | Reviews              | Social prescribing                                      | Systematic review                                                                                                        | Independent research team | Moderate  |
| Bird, Biddle, Powell [60]                       | 2019 | England | Mixed Methods        | CLICK into activity, community based physical activity  | Mixed methods evaluation using RE-AIM framework with uncontrolled before-and-after design questionnaires, interviews and | Independent research team | Moderate  |

|                                                                              |      |         |                      |                                                           |                                                                                                                                           |                                                                 |          |
|------------------------------------------------------------------------------|------|---------|----------------------|-----------------------------------------------------------|-------------------------------------------------------------------------------------------------------------------------------------------|-----------------------------------------------------------------|----------|
|                                                                              |      |         |                      |                                                           | programme-related documentation.                                                                                                          |                                                                 |          |
| Campbell, Winder, Richards, Hobart [61]                                      | 2007 | England | Quantitative         | Welfare advice services                                   | Longitudinal postal survey                                                                                                                | No description of research team                                 | High     |
| Carnes, Sohanpal, Frostick, Hull, Mathur, Netuveli, Tong, Hutt, Bertotti [9] | 2017 | England | Mixed Methods        | Social prescribing pilot                                  | Patient surveys with matched control groups, interviews with service users                                                                | Independent research team                                       | High     |
| Chatterjee, Camic, Lockyer, Thomson [62]                                     | 2018 | England | Reviews              | Social prescribing (non-clinical community interventions) | Systematic review                                                                                                                         | Independent research team                                       | Moderate |
| Cheetham, Van der Graaf, Khazaeli, Gibson, Wiseman, Rushmer [63]             | 2018 | England | Mixed Methods        | Integrated wellness service                               | In-depth semi-structured interviews with service users, focus groups with service-users and non-service users and routine monitoring data | No description of research team                                 | Moderate |
| Craig, Booth, Hall, Story, Hayward, Goodburn, Zumla [64]                     | 2008 | England | Mixed Methods        | Tuberculosis link worker                                  | Cohort process evaluation and interviews with service providers                                                                           | Mixed research team, researchers became stakeholders in project | Low      |
| Crone, Sumner, Baker, Loughren, Hughes, James [65]                           | 2018 | England | Quantitative         | Arts on Prescription                                      | Uncontrolled before-and-after design                                                                                                      | No description of research team                                 | Moderate |
| Cwm Taf UHB [66]                                                             | 2015 | Wales   | Mixed Methods (grey) | Social prescribing for healthy lifestyles                 | Literature review, survey, semi-structured interviews                                                                                     | In-house evaluation                                             | Low      |
| Dayson [67]                                                                  | 2017 | England | Mixed Methods        | Social innovation pilot in the community                  | Service evaluation with uncontrolled before-and-after design and interviews with patients, carers, commissioners and providers            | Independent research team                                       | High     |

|                                                                                                   |      |             |                      |                                                                                                            |                                                                                                                              |                                   |          |
|---------------------------------------------------------------------------------------------------|------|-------------|----------------------|------------------------------------------------------------------------------------------------------------|------------------------------------------------------------------------------------------------------------------------------|-----------------------------------|----------|
| Dayson, Painter, Bennett [68]                                                                     | 2020 | England     | Qualitative          | Holistic social prescribing with link worker                                                               | Qualitative case study with three nested case studies; semi-structured interviews with commissioners, providers and patients | No description of research team   | Moderate |
| Elston, Gradinger, Asthana, Lilley-Woolnough, Wroe, Harman, Byng [69]                             | 2019 | England     | Quantitative         | Holistic well-being co-ordinator service                                                                   | Uncontrolled before-and-after design                                                                                         | Mixed research team               | High     |
| Grayer, Cape, Orpwood, Leibowitz, Buszewicz [70]                                                  | 2008 | England     | Quantitative         | Graduate Primary Care Community Link scheme                                                                | Uncontrolled before-and-after design                                                                                         | Independent research team         | Low      |
| Grow Well [71]                                                                                    | 2017 | Wales       | Mixed Methods (grey) | Therapeutic horticultural support, social prescribing in community gardening                               | Uncontrolled before-and-after design, feedback, case studies, monitoring data analysis                                       | In-house evaluation               | Low      |
| Grow Well [72]                                                                                    | 2017 | Wales       | Mixed Methods (grey) | Therapeutic horticultural support, social prescribing in community gardening                               | Uncontrolled before-and-after design, survey                                                                                 | Independent research team         | Moderate |
| Hanlon, Gray, Chng, Mercer [73]                                                                   | 2019 | Scotland    | Qualitative          | Links Worker Programme, social prescribing to target negative impacts of the social determinants of health | Semi-structured interviews with service users                                                                                | Independent research team         | Moderate |
| Hassan, Giebel, Khedmati Morasae, Rotheram, Mathieson, Ward, Reynolds, Price, Bristow, Kullu [74] | 2020 | England     | Qualitative          | Life Rooms, social prescribing to address the social determinants of mental health                         | Semi-structured focus groups with service users                                                                              | Mixed research team including PPI | Moderate |
| Heijnders, Meijjs [75]                                                                            | 2018 | Netherlands | Qualitative          | Holistic social prescribing with link worker                                                               | Semi-structured, in-depth interviews with service users                                                                      | Mixed research team               | Low      |

|                                                                                        |      |          |               |                                                                                                                            |                                                                                                       |                                 |          |
|----------------------------------------------------------------------------------------|------|----------|---------------|----------------------------------------------------------------------------------------------------------------------------|-------------------------------------------------------------------------------------------------------|---------------------------------|----------|
| Holding, Thompson, Foster, Haywood [76]                                                | 2020 | England  | Qualitative   | Social prescribing targeting loneliness with link workers                                                                  | Semi-structured interviews with staff and volunteers                                                  | Independent research team       | Moderate |
| Husk, Blockley, Lovell, Bethel, Lang, Byng, Garside [77]                               | 2019 | England  | Reviews       | Social prescribing                                                                                                         | Realist review                                                                                        | Independent research team       | Low      |
| Irvine, Marselle, Melrose, Warber [78]                                                 | 2020 | Scotland | Mixed Methods | Nature-based intervention                                                                                                  | Feasibility study, uncontrolled before-and-after design, interviews with service users                | Mixed research team             | Low      |
| Jarrett, Thornicroft, Forrester, Harty, Senior, King, Huckle, Parrott, Dunn, Shaw [79] | 2012 | England  | Quantitative  | Critical Time Intervention to support mentally-ill prisoners post release (social, clinical, housing and welfare services) | Pilot Randomised Controlled Design                                                                    | Mixed research team             | Moderate |
| Jensen [80]                                                                            | 2019 | Denmark  | Qualitative   | Arts on Prescription                                                                                                       | Semi-structured interviews with service users                                                         | No description of research team | Low      |
| Jensen, Bonde [81]                                                                     | 2018 | Denmark  | Reviews       | Arts on Prescription                                                                                                       | Literature review                                                                                     | Independent research team       | Low      |
| Jensen, Torrissen [82]                                                                 | 2019 | Denmark  | Qualitative   | Arts on Prescription                                                                                                       | Semi-structured interviews with service users                                                         | No description of research team | Low      |
| Kellezi, Wakefield, Stevenson, McNamara, Mair, Bowe, Wilson, Halder [83]               | 2019 | England  | Mixed Methods | Social prescribing                                                                                                         | Semi structured interviews and longitudinal survey                                                    | No description of research team | Moderate |
| Kilgarriff-Foster, O'Cathain [84]                                                      | 2015 | England  | Reviews       | Social prescribing                                                                                                         | Literature review                                                                                     | Independent research team       | Low      |
| Kingstone, Bartlam, Burroghs, Bullock, Lovell, Ray, Bower, Waheed, Gilbody,            | 2019 | England  | Qualitative   | Tailored social prescribing, behavioural activation                                                                        | Semi-structured interviews with older people and support workers; interviews or focus groups with GPs | Mixed research team             | High     |

|                                                                                                                                                               |      |                  |                      |                                                          |                                                                                                                                                     |                                 |          |
|---------------------------------------------------------------------------------------------------------------------------------------------------------------|------|------------------|----------------------|----------------------------------------------------------|-----------------------------------------------------------------------------------------------------------------------------------------------------|---------------------------------|----------|
| Nicholls, Chew-Graham [85]                                                                                                                                    |      |                  |                      |                                                          |                                                                                                                                                     |                                 |          |
| Lloyd-Evans, Frerichs, Stefanidou, Bone, Pinfold, Lewis, Billings, Barber, Chhappia, Chipp, Henderson, Shah, Shorten, Giorgalli, Terhune, Jones, Johnson [28] | 2020 | England          | Mixed Methods        | Community Navigator programme                            | Feasibility randomised controlled trial with semi-structured qualitative interviews with participants, Community Navigators and other stakeholders. | Mixed research team             | High     |
| Loftus, McCauley, McCarron [86]                                                                                                                               | 2017 | Northern Ireland | Quantitative         | Social prescribing pathway                               | Uncontrolled before-and-after design                                                                                                                | Mixed research team             | Low      |
| Mantell Gwynedd [87]                                                                                                                                          | 2018 | Wales            | Mixed Methods (grey) | Social prescribing, Community link service               | Monitoring data analysis, interviews with service users                                                                                             | In-house evaluation             | High     |
| Maughan, Patel, Parveen, Braithwaite, Cook, Lillywhite, Cooke [88]                                                                                            | 2015 | England          | Quantitative         | CONNECT: social prescribing                              | Observational study                                                                                                                                 | No description of research team | Low      |
| Maund, Irvine, Reeves, Strong, Cromie, Dallimer, Davies [89]                                                                                                  | 2019 | England          | Mixed Methods        | Wetlands for Wellbeing, Nature-based health intervention | Questionnaires, focus groups and semi-structured interviews for participants and healthcare professionals                                           | No description of research team | Moderate |
| Mercer, Fitzpatrick, Grant, Chng, McConnachie, Bakshi, James-Rae, O'Donnell, Wyke [27]                                                                        | 2019 | Scotland         | Quantitative         | Primary Care Community Links Practitioner                | Quasi-experimental cluster-randomised controlled trial                                                                                              | No description of research team | High     |
| Milestone tweed [90]                                                                                                                                          | 2018 | Wales            | Mixed Methods (grey) | Singing for Lung Health                                  | Uncontrolled before-and-after design, interviews with staff                                                                                         | In-house evaluation             | Low      |

|                                                                                                                         |      |           |                    |                                                                |                                                                                    |                                    |          |
|-------------------------------------------------------------------------------------------------------------------------|------|-----------|--------------------|----------------------------------------------------------------|------------------------------------------------------------------------------------|------------------------------------|----------|
| Moffatt, Steer, Lawson, Penn, O'Brien [5]                                                                               | 2017 | England   | Qualitative        | Ways to Wellness, Holistic social prescribing with link worker | Semi-structured interviews with service users                                      | No description of research team    | High     |
| Mon Community Link [91]                                                                                                 | 2020 | Wales     | Qualitative (grey) | Social prescribing with link worker                            | Case studies                                                                       | No description of research team    | Low      |
| Natural England [92]                                                                                                    | 2017 | England   | Review (grey)      | Nature-based interventions                                     | Evidence review                                                                    | Mixed research team                | Moderate |
| Panagioti, Reeves, Meacock, Parkinson, Lovell, Hann, Howells, Blakemore, Riste, Coventry, Blakeman, Sidaway, Bower [26] | 2018 | England   | Quantitative       | Health coaching                                                | Trials within Cohorts design                                                       | No description of research team    | High     |
| Payne, Walton, Burton [23]                                                                                              | 2020 | England   | Qualitative        | Multi-activity social prescribing                              | Semi-structured interviews with service users                                      | No description of research team    | Moderate |
| Pescheny, Gunn, Randhawa, Pappas [2]                                                                                    | 2019 | England   | Quantitative       | Social prescribing with navigators                             | Uncontrolled before-and-after design                                               | Mixed research team                | Moderate |
| Pescheny, Randhawa, Pappas [93]                                                                                         | 2018 | England   | Qualitative        | Social prescribing with link worker                            | Semi-structured interviews with service users, navigators and GPs                  | Independent research team          | Moderate |
| Pescheny, Randhawa, Pappas [29]                                                                                         | 2020 | England   | Reviews            | Social prescribing                                             | Systematic review                                                                  | Independent research team          | High     |
| Pesut, Duggleby, Warner, Fassbender, Antifeau, Hooper, Greig, Sullivan [94]                                             | 2018 | Canada    | Mixed Methods      | N-CARE, nurse navigation in early palliative care              | Pilot study using questionnaires and semi-structured interviews with service users | Mixed research team, including PPI | Moderate |
| Poulos, Marwood, Harkin, Opher, Clift, Cole, Rhee,                                                                      | 2018 | Australia | Mixed Methods      | Arts on Prescription                                           | Program evaluation including uncontrolled before-and-after design,                 | Mixed research team                | High     |

|                                                                                     |      |          |                      |                                                                                                            |                                                                                                                         |                                                                       |          |
|-------------------------------------------------------------------------------------|------|----------|----------------------|------------------------------------------------------------------------------------------------------------|-------------------------------------------------------------------------------------------------------------------------|-----------------------------------------------------------------------|----------|
| Beilharz, Poulos [95]                                                               |      |          |                      |                                                                                                            | focus groups and interviews                                                                                             |                                                                       |          |
| Prior, Coffey, Robins, Cook [96]                                                    | 2019 | England  | Quantitative         | Exercise on referral                                                                                       | Uncontrolled before-and-after design                                                                                    | No description of research team                                       | Low      |
| Public Health Wales [97]                                                            | 2019 | Wales    | Quantitative (grey)  | Social prescribing with link worker                                                                        | Uncontrolled before-and-after design                                                                                    | Mixed research team                                                   | Moderate |
| Public Health Wales [98]                                                            | 2018 | Wales    | Review (grey)        | Social prescribing in Wales                                                                                | Evidence mapping                                                                                                        | Mixed research team                                                   | Low      |
| Rainbow Centre Penley [99]                                                          | 2019 | Wales    | Mixed Methods (grey) | Social prescribing                                                                                         | Referral numbers and case study                                                                                         | In-house evaluation                                                   | Low      |
| Rainbow Centre Penley [100]                                                         | 2019 | Wales    | Mixed Methods (grey) | Social prescribing                                                                                         | Referral numbers and case study                                                                                         | In-house evaluation                                                   | Low      |
| Rainbow Centre Penley [101]                                                         | 2019 | Wales    | Mixed Methods (grey) | Social prescribing                                                                                         | Case studies, patient reported outcomes                                                                                 | In-house evaluation                                                   | Low      |
| Redmond, Sumner, Crone, Hughes [24]                                                 | 2019 | England  | Qualitative          | Arts on Prescription                                                                                       | Qualitative survey of service users                                                                                     | Research team, involved with programme development and implementation | Low      |
| Rempel, Wilson, Durrant, Barnett [8]                                                | 2017 | England  | Reviews              | Social referral programmes                                                                                 | Systematic review                                                                                                       | Independent research team                                             | High     |
| Rhondda GP cluster [102]                                                            | 2017 | Wales    | Mixed Methods (grey) | Well-being co-ordinator service                                                                            | Monitoring data analysis, testimonial, survey with service users, practice and providers                                | In-house evaluation                                                   | Moderate |
| Skivington, Smith, Chng, Mackenzie, Wyke, Mercer [103]                              | 2018 | Scotland | Qualitative          | Links Worker Programme, social prescribing to target negative impacts of the social determinants of health | Semi-structured interviews with community organisation representatives and Community Links Practitioners [link workers] | No description of research team                                       | Moderate |
| Smith, Jimoh, Cross, Allan, Corbett, Sadler, Khondoker, Whitty, Valderas, Fox [104] | 2019 | England  | Reviews              | Social prescribing for frail older adults                                                                  | Systematic review                                                                                                       | Independent research team                                             | Low      |

|                                                 |      |          |                      |                                                                              |                                                                                                   |                                   |          |
|-------------------------------------------------|------|----------|----------------------|------------------------------------------------------------------------------|---------------------------------------------------------------------------------------------------|-----------------------------------|----------|
| Social prescribing Torfaen [105]                | 2017 | Wales    | Mixed Methods (grey) | Social prescribing                                                           | Monitoring data analysis, case studies                                                            | In-house evaluation               | Low      |
| Social prescribing Torfaen [106]                | 2018 | Wales    | Mixed Methods (grey) | Social prescribing                                                           | Monitoring data analysis, case studies                                                            | In-house evaluation               | Low      |
| Social Value Cymru [107]                        | 2019 | Wales    | Mixed Methods (grey) | Social Prescribing via Community Link Officer                                | Monitoring data analysis                                                                          | In-house evaluation               | Moderate |
| Stalker, Malloch, Barry, Watson [108]           | 2008 | Scotland | Mixed Methods        | Local area coordination for people with learning disabilities                | Case studies, postal questionnaire and semi-structured interviews with co-ordinators and managers | Independent research team         | Moderate |
| Stickley, Eades [109]                           | 2013 | England  | Qualitative          | Arts on Prescription                                                         | Semi-structured interviews with service users                                                     | Independent research team         | Moderate |
| Stickley, Hui [110]                             | 2012 | England  | Qualitative          | Arts on Prescription                                                         | Narrative inquiry using in-depth interviews with service users                                    | Mixed research team including PPI | Moderate |
| Stickley, Hui [111]                             | 2012 | England  | Qualitative          | Arts on Prescription                                                         | In-depth semi-structured interviews with referrers                                                | Mixed research team including PPI | Moderate |
| The Growing Project [112]                       | 2017 | Wales    | Mixed Methods (grey) | Therapeutic horticultural support, social prescribing in community gardening | Monitoring data analysis, interviews with service users                                           | In-house evaluation               | Low      |
| Thomson, Lockyer, Camic, Chatterjee [113]       | 2018 | England  | Quantitative         | Museum-based social prescription                                             | Uncontrolled before-and-after design                                                              | No description of research team   | Moderate |
| Todd, Camic, Lockyer, Thomson, Chatterjee [114] | 2017 | England  | Qualitative          | Museum-based social prescription                                             | Semi-structured interviews and weekly diary entries from service users                            | No description of research team   | Moderate |
| van de Venter, Buller [115]                     | 2014 | England  | Mixed Methods        | Arts on Prescription                                                         | Uncontrolled before-and-after design and interviews with service users                            | No description of research team   | High     |
| Vogelpoel, Jarrold [116]                        | 2014 | England  | Mixed Methods        | Arts on Prescription                                                         | Uncontrolled before-and-after design, interviews and dynamic                                      | Mixed research team               | Moderate |



|                                                                                                                                              |      |          |                      |                                                                |                                                                                                                      |                                 |          |
|----------------------------------------------------------------------------------------------------------------------------------------------|------|----------|----------------------|----------------------------------------------------------------|----------------------------------------------------------------------------------------------------------------------|---------------------------------|----------|
|                                                                                                                                              |      |          |                      |                                                                | observation proformas, case studies                                                                                  |                                 |          |
| Warm Wales [117]                                                                                                                             | 2019 | Wales    | Mixed Methods (grey) | Warm Wales, tackling fuel poverty                              | Case study design                                                                                                    | In-house evaluation             | Low      |
| We are tempo [118]                                                                                                                           | 2020 | Wales    | Mixed Methods (grey) | Time Credits, time based community support                     | Impact evaluation, surveys and journey mapping                                                                       | In-house evaluation             | Moderate |
| Webb, Thompson, Ruffino, Davies, Watkeys, Hooper, Jones, Walkters, Clayton, Thomas, Morris, Llewellyn, Ward, Wyatt-Williams, McDonnell [119] | 2016 | Wales    | Quantitative         | National Exercise on Referral Scheme                           | Uncontrolled before-and-after design                                                                                 | No description of research team | Low      |
| Wellbeing 4 U [120]                                                                                                                          | 2018 | Wales    | Mixed Methods (grey) | Social prescribing, Well-being co-ordinators                   | Monitoring data analysis, survey, case studies                                                                       | In-house evaluation             | Moderate |
| Welsh Government [121]                                                                                                                       | 2010 | Wales    | Mixed Methods (grey) | National Exercise on Referral Scheme                           | Randomised controlled trial design with nested process and economic evaluation                                       | Independent research team       | Moderate |
| Whitelaw, Thirlwall, Morrison, Osborne, Tattum, Walker [122]                                                                                 | 2017 | Scotland | Qualitative          | Social prescribing in General Practice                         | Case study design using semi-structured interviews with steering group, wider primary care team and community groups | No description of research team | Moderate |
| Wildman, Moffatt, Steer, Laing, Penn, O'Brien [21]                                                                                           | 2019 | England  | Qualitative          | Ways to Wellness, Holistic social prescribing with link worker | Semi-structured interviews with service users                                                                        | No description of research team | Moderate |
| Woodall, Trigwell, Bunyan, Raine, Eaton, Davis, Hancock, Cunningham, Wilkinson [32]                                                          | 2018 | England  | Mixed Methods        | Social prescribing with well-being co-ordinators               | Uncontrolled before-and-after design and interviews with service users                                               | No description of research team | High     |

|                                      |      |         |             |                         |                                                                                                  |                           |     |
|--------------------------------------|------|---------|-------------|-------------------------|--------------------------------------------------------------------------------------------------|---------------------------|-----|
| Woodhead, Collins, Lomas, Raine [22] | 2017 | England | Qualitative | Welfare advice services | Realist semi-structured interviews with general practice staff, advice staff and service funders | Independent research team | Low |
|--------------------------------------|------|---------|-------------|-------------------------|--------------------------------------------------------------------------------------------------|---------------------------|-----|
